# Supplementary material
Source: PubMed Central journal article supplement (PMC11114555)
Supplement: 18_2012_948_MOESM1_ESM.pdf [file 18_2012_948_MOESM1_ESM.pdf]

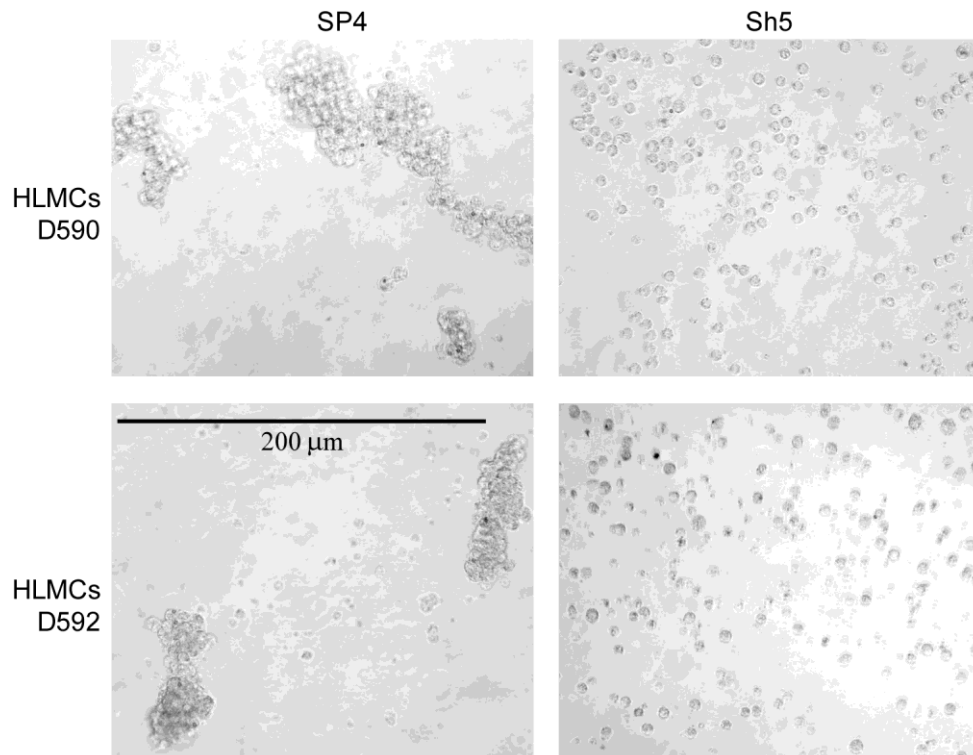

**Supplemental figure 1. SP4 overexpression results in strong cell adhesion in HLMCs.** HLMCs, D590 and D592, were transduced with SP4 and Sh5 RNA, washed with HBSS and pipetted 5 times. Magnification x100.
